# Supplementary material for: Direct synthesis of PEG-encapsulated gold nanoparticles using branched copolymer nanoreactors
Source: Royal Society of Chemistry journal article supplement (doi:10.1039/c4ra03500c), 2014-01-01
Supplement: c4ra03500c1.pdf [file c4ra03500c1.pdf]

## Supporting information

### Direct synthesis of PEG-encapsulated gold nanoparticles using branched copolymer nanoreactors

Iain E. Dunlop<sup>a,\*</sup>, Mary P. Ryan<sup>a</sup>, Angela E. Goode<sup>a</sup>, Carlos Schuster<sup>a</sup>, Nicholas J. Terrill<sup>b</sup>  
and Jonathan V.M. Weaver<sup>a,c+</sup>

<sup>a</sup> Department of Materials and <sup>c</sup> Department of Bioengineering, Imperial College London, Exhibition Road, London SW7 2AZ, U.K. <sup>b</sup> Diamond Light Source Ltd., Diamond House, Harwell Science and Innovation Campus, Chilton, Didcot, Oxfordshire, OX11 0DE, U.K.

+ Deceased.

#### Full fitting parameters for SAXS data

Full fitting parameters for fits shown in figures 5 and 6. Errors were determined by fitting to the maximum and minimum acceptable radius, with cooperative varying of the prefactor *scale* (proportional to volume factor) and the Schultz-distributed polydispersity index ( $\sigma / x_{mean}$ ). The table below shows the best fit in bold, bracketed by the fits used to determine the errors. All fits use: Solvent s.l.d.  $9.46 \times 10^{-6} \text{ \AA}^{-1}$ , particle s.l.d.  $1.23 \times 10^{-4} \text{ \AA}^{-1}$ , background  $2 \times 10^{-5}$  arb. units. The X-ray dose given is the total cumulative dose received by the sample at the end of the measurement.

#### 38% molar ratio HAuCl<sub>4</sub> : DEAMA, in situ (with X-ray exposure)

| Reaction time / hours | X-ray dose / (photons / mm <sup>2</sup> ) | Mean particle radius / $\text{\AA}$<br>$x_{mean}$ | Poly-dispersity ( $\sigma / x_{mean}$ ) | Scale       |
|-----------------------|-------------------------------------------|---------------------------------------------------|-----------------------------------------|-------------|
| 1.6                   | 3.6                                       | 5                                                 | 3.80E-09                                | 0.9         |
|                       |                                           | <b>7</b>                                          | <b>3.70E-09</b>                         | <b>0.7</b>  |
|                       |                                           | 9                                                 | 3.10E-09                                | 0.6         |
| 1.9                   | 7.2                                       | 9.5                                               | 4.80E-09                                | 0.63        |
|                       |                                           | <b>11.5</b>                                       | <b>4.80E-09</b>                         | <b>0.53</b> |
|                       |                                           | 13.5                                              | 4.50E-09                                | 0.45        |
| 2.1                   | 10.8                                      | 14                                                | 5.10E-09                                | 0.48        |
|                       |                                           | <b>15</b>                                         | <b>5.00E-09</b>                         | <b>0.45</b> |
|                       |                                           | 16                                                | 5.00E-09                                | 0.4         |
| 2.4                   | 14.4                                      | 15                                                | 5.40E-09                                | 0.46        |
|                       |                                           | <b>16</b>                                         | <b>5.30E-09</b>                         | <b>0.42</b> |
|                       |                                           | 17                                                | 5.20E-09                                | 0.39        |
| 2.6                   | 18.0                                      | 16.5                                              | 5.80E-09                                | 0.43        |
|                       |                                           | <b>17.5</b>                                       | <b>6.00E-09</b>                         | <b>0.4</b>  |

|      |       |           |                 |             |
|------|-------|-----------|-----------------|-------------|
|      |       | 18.5      | 5.80E-09        | 0.37        |
| 3.1  | 25.4  | 20        | 6.60E-09        | 0.34        |
|      |       | <b>18</b> | <b>6.60E-09</b> | <b>0.4</b>  |
|      |       | 17        | 6.80E-09        | 0.43        |
| 3.6  | 32.4  | 15        | 7.00E-09        | 0.56        |
|      |       | <b>17</b> | <b>7.00E-09</b> | <b>0.47</b> |
|      |       | 19        | 6.50E-09        | 0.4         |
| 4.2  | 39.6  | 17        |                 |             |
|      |       | <b>15</b> | <b>6.90E-09</b> | <b>0.63</b> |
|      |       | 13        | 7.10E-09        | 0.73        |
| 4.7  | 46.8  | 18        | 7.50E-09        | 0.56        |
|      |       | <b>16</b> | <b>7.50E-09</b> | <b>0.63</b> |
|      |       | 15        | 7.50E-09        | 0.66        |
| 5.7  | 61.2  | 17        | 7.80E-09        | 0.58        |
|      |       | <b>15</b> | <b>8.00E-09</b> | <b>0.66</b> |
|      |       | 13        | 8.00E-09        | 0.74        |
| 6.9  | 79.2  | 16        | 8.20E-09        | 0.56        |
|      |       | <b>17</b> | <b>8.00E-09</b> | <b>0.53</b> |
|      |       | 18        | 8.00E-09        | 0.49        |
| 9.0  | 108.0 | 17        | 8.00E-09        | 0.52        |
|      |       | <b>19</b> | <b>8.00E-09</b> | <b>0.47</b> |
|      |       | 21        | 8.00E-09        | 0.4         |
| 12.6 | 115.2 | 19        | 8.50E-09        | 0.45        |
|      |       | <b>21</b> | <b>8.30E-09</b> | <b>0.4</b>  |
|      |       | 23        | 8.30E-09        | 0.33        |
| 18.7 | 122.4 | 21        | 6.00E-09        | 0.46        |
|      |       | <b>17</b> | <b>6.20E-09</b> | <b>0.57</b> |
|      |       | 13        | 6.80E-09        | 0.72        |

*19% molar ratio H<sub>Au</sub>Cl<sub>4</sub> : DEAMA, in situ (with X-ray exposure)*

| Reaction time / hours | X-ray dose | Mean particle radius<br>$x_{mean}$ | Poly-dispersity<br>( $\sigma / x_{mean}$ ) | Scale       |
|-----------------------|------------|------------------------------------|--------------------------------------------|-------------|
| 12.6                  | 115.2      | 23                                 | 7.30E-10                                   | 0.6         |
|                       |            | <b>21</b>                          | <b>7.50E-10</b>                            | <b>0.67</b> |
|                       |            | 19                                 | 7.70E-10                                   | 0.7         |
| 18.7                  | 122.4      | 31                                 | 2.10E-09                                   | 0.5         |
|                       |            | <b>29</b>                          | <b>2.10E-09</b>                            | <b>0.55</b> |
|                       |            | 27                                 | 2.10E-09                                   | 0.59        |

**38% molar ratio  $\text{HAuCl}_4$  : DEAMA, ex situ (without X-ray exposure)**

| <b>Reaction time / hours</b> | <b>Mean particle radius<br/><math>x_{mean}</math></b> | <b>Poly-dispersity<br/>(<math>\sigma / x_{mean}</math>)</b> | <b>Scale</b> |
|------------------------------|-------------------------------------------------------|-------------------------------------------------------------|--------------|
| 11.1                         | 21                                                    | 2.10E-09                                                    | 0.55         |
|                              | <b>19</b>                                             | <b>2.20E-09</b>                                             | <b>0.6</b>   |
|                              | 15                                                    | 2.35E-09                                                    | 0.8          |
| 19.4                         | 33                                                    | 5.50E-09                                                    | 0.38         |
|                              | <b>31</b>                                             | <b>5.50E-09</b>                                             | <b>0.42</b>  |
|                              | 29                                                    | 5.50E-09                                                    | 0.46         |

**19% molar ratio  $\text{HAuCl}_4$  : DEAMA, ex situ (without X-ray exposure)**

| <b>Reaction time / hours</b> | <b>Mean particle radius<br/><math>x_{mean}</math></b> | <b>Poly-dispersity<br/>(<math>\sigma / x_{mean}</math>)</b> | <b>Scale</b> |
|------------------------------|-------------------------------------------------------|-------------------------------------------------------------|--------------|
| 11.1                         | 23                                                    | 7.30E-10                                                    | 0.6          |
|                              | <b>21</b>                                             | <b>7.50E-10</b>                                             | <b>0.67</b>  |
|                              | 19                                                    | 7.70E-10                                                    | 0.7          |
| 19.4                         | 31                                                    | 2.10E-09                                                    | 0.5          |
|                              | <b>29</b>                                             | <b>2.10E-09</b>                                             | <b>0.55</b>  |
|                              | 27                                                    | 2.10E-09                                                    | 0.59         |

**TEM image from Fig 1: full field of view**

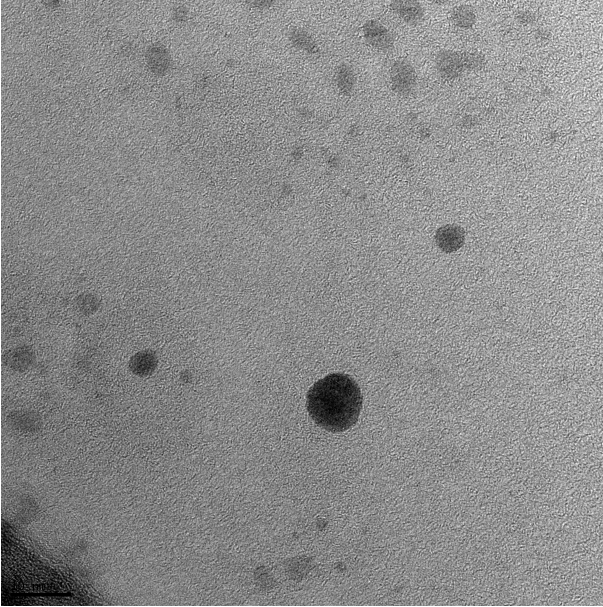

Fig S.1. TEM Image of gold nanoparticles template by branched copolymers. Same image as Fig 1, showing full field of view.
